# Supplementary material for: Formation, evolution, and drainage of short-lived glacial lakes in permafrost environments of the northern Teskey Range, Central Asia
Source: Copernicus journal article supplement (doi:10.5194/nhess-21-2245-2021), 2021-07-29
Supplement: Supplementary file 1 [file nhess-21-2245-2021-supplement.pdf]

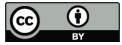

*Supplement of*

**Formation, evolution, and drainage of short-lived glacial lakes in permafrost environments of the northern Teskey Range, Central Asia**

**Mirlan Daiyrov and Chiyuki Narama**

*Correspondence to:* Mirlan Daiyrov (mirlan085@gmail.com) and Chiyuki Narama (narama@env.sc.niigata-u.ac.jp)

The copyright of individual parts of the supplement might differ from the article licence.

---

## Landsat-7 and 8

---

| <b>ID</b> | <b>Satellite</b>       | <b>Acquisition date</b> | <b>Resolution (m)</b> |
|-----------|------------------------|-------------------------|-----------------------|
| 1         | Landsat-8/OLI          | 12-Jun-13               | 15 (pan)              |
| 2         | Landsat-8/OLI          | 19-Jun-13               | 15 (pan)              |
| 3         | Landsat-8/OLI          | 5-Jul-13                | 15 (pan)              |
| 4         | Landsat-8/OLI          | 28-Jul-13               | 15 (pan)              |
| 5         | Landsat-7 ETM+/SLC-off | 29-Jul-13               | 15 (pan)              |
| 6         | Landsat-8/OLI          | 30-Jul-13               | 15 (pan)              |
| 7         | Landsat-8/OLI          | 6-Aug-13                | 15 (pan)              |
| 8         | Landsat-8/OLI          | 15-Aug-13               | 15 (pan)              |
| 9         | Landsat-8/OLI          | 29-Aug-13               | 15 (pan)              |
| 10        | Landsat-8/OLI          | 31-Aug-13               | 15 (pan)              |
| 11        | Landsat-8/OLI          | 1-Sep-13                | 15 (pan)              |
| 12        | Landsat-8/OLI          | 7-Sep-13                | 15 (pan)              |
| 13        | Landsat-7 ETM+/SLC-off | 8-Sep-13                | 15 (pan)              |
| 14        | Landsat-8/OLI          | 23-Sep-13               | 15 (pan)              |
| 15        | Landsat-7 ETM+/SLC-off | 24-Sep-13               | 15 (pan)              |
| 16        | Landsat-7 ETM+/SLC-off | 1-Oct-13                | 15 (pan)              |
| 17        | Landsat-8/OLI          | 9-Oct-13                | 15 (pan)              |
| 18        | Landsat-7 ETM+/SLC-off | 10-Oct-13               | 15 (pan)              |
| 19        | Landsat-8/OLI          | 5-May-14                | 15 (pan)              |
| 20        | Landsat-7 ETM+/SLC-off | 29-May-14               | 15 (pan)              |
| 21        | Landsat-7 ETM+/SLC-off | 14-Jun-14               | 15 (pan)              |
| 22        | Landsat-8/OLI          | 15-Jun-14               | 15 (pan)              |
| 23        | Landsat-8/OLI          | 27-Jun-14               | 15 (pan)              |
| 24        | Landsat-7 ETM+/SLC-off | 30-Jun-14               | 15 (pan)              |
| 25        | Landsat-8/OLI          | 1-Jul-14                | 15 (pan)              |
| 26        | Landsat-8/OLI          | 8-Jul-14                | 15 (pan)              |
| 27        | Landsat-7 ETM+/SLC-off | 9-Jul-14                | 15 (pan)              |
| 28        | Landsat-7 ETM+/SLC-off | 16-Jul-14               | 15 (pan)              |
| 29        | Landsat-7 ETM+/SLC-off | 25-Jul-14               | 15 (pan)              |
| 30        | Landsat-7 ETM+/SLC-off | 1-Aug-14                | 15 (pan)              |
| 31        | Landsat-8/OLI          | 2-Aug-14                | 15 (pan)              |
| 32        | Landsat-7 ETM+/SLC-off | 10-Aug-14               | 15 (pan)              |
| 33        | Landsat-8/OLI          | 25-Aug-14               | 15 (pan)              |
| 34        | Landsat-8/OLI          | 1-Sep-14                | 15 (pan)              |
| 35        | Landsat-7 ETM+/SLC-off | 2-Sep-14                | 15 (pan)              |
| 36        | Landsat-8/OLI          | 3-Sep-14                | 15 (pan)              |
| 37        | Landsat-8/OLI          | 10-Sep-14               | 15 (pan)              |

|    |                        |           |          |
|----|------------------------|-----------|----------|
| 38 | Landsat-7 ETM+/SLC-off | 18-Sep-14 | 15 (pan) |
| 39 | Landsat-8/OLI          | 19-Sep-14 | 15 (pan) |
| 40 | Landsat-8/OLI          | 26-Sep-14 | 15 (pan) |
| 41 | Landsat-7 ETM+/SLC-off | 17-Jun-15 | 15 (pan) |
| 42 | Landsat-8/OLI          | 18-Jun-15 | 15 (pan) |
| 43 | Landsat-8/OLI          | 2-Jul-15  | 15 (pan) |
| 44 | Landsat-7 ETM+/SLC-off | 3-Jul-15  | 15 (pan) |
| 45 | Landsat-8/OLI          | 4-Jul-15  | 15 (pan) |
| 46 | Landsat-8/OLI          | 11-Jul-15 | 15 (pan) |
| 47 | Landsat-7 ETM+/SLC-off | 12-Jul-15 | 15 (pan) |
| 48 | Landsat-8/OLI          | 18-Jul-15 | 15 (pan) |
| 49 | Landsat-8/OLI          | 30-Jul-15 | 15 (pan) |
| 50 | Landsat-8/OLI          | 12-Aug-15 | 15 (pan) |
| 51 | Landsat-8/OLI          | 19-Aug-15 | 15 (pan) |
| 52 | Landsat-7 ETM+/SLC-off | 20-Aug-15 | 15 (pan) |
| 53 | Landsat-8/OLI          | 21-Aug-15 | 15 (pan) |
| 54 | Landsat-8/OLI          | 4-Sep-15  | 15 (pan) |
| 55 | Landsat-7 ETM+/SLC-off | 5-Sep-15  | 15 (pan) |
| 56 | Landsat-8/OLI          | 6-Sep-15  | 15 (pan) |
| 57 | Landsat-8/OLI          | 13-Sep-15 | 15 (pan) |
| 58 | Landsat-8/OLI          | 29-Sep-15 | 15 (pan) |
| 59 | Landsat-8/OLI          | 8-Oct-15  | 15 (pan) |
| 60 | Landsat-7 ETM+/SLC-off | 10-Jun-16 | 15 (pan) |
| 61 | Landsat-8/OLI          | 11-Jun-16 | 15 (pan) |
| 62 | Landsat-7 ETM+/SLC-off | 26-Jun-16 | 15 (pan) |
| 63 | Landsat-8/OLI          | 20-Jun-16 | 15 (pan) |
| 64 | Landsat-7 ETM+/SLC-off | 12-Jul-16 | 15 (pan) |
| 65 | Landsat-8/OLI          | 13-Jul-16 | 15 (pan) |
| 66 | Landsat-8/OLI          | 20-Jul-16 | 15 (pan) |
| 67 | Landsat-7 ETM+/SLC-off | 21-Jul-16 | 15 (pan) |
| 68 | Landsat-8/OLI          | 22-Jul-16 | 15 (pan) |
| 69 | Landsat-8/OLI          | 29-Jul-16 | 15 (pan) |
| 70 | Landsat-7 ETM+/SLC-off | 30-Jul-16 | 15 (pan) |
| 71 | Landsat-8/OLI          | 7-Aug-16  | 15 (pan) |
| 72 | Landsat-7 ETM+/SLC-off | 13-Aug-16 | 15 (pan) |
| 73 | Landsat-8/OLI          | 14-Aug-16 | 15 (pan) |
| 74 | Landsat-8/OLI          | 21-Aug-16 | 15 (pan) |
| 75 | Landsat-7 ETM+/SLC-off | 22-Aug-16 | 15 (pan) |
| 76 | Landsat-8/OLI          | 23-Aug-16 | 15 (pan) |

|     |                        |           |          |
|-----|------------------------|-----------|----------|
| 77  | Landsat-7 ETM+/SLC-off | 7-Sep-16  | 15 (pan) |
| 78  | Landsat-8/OLI          | 8-Sep-16  | 15 (pan) |
| 79  | Landsat-7 ETM+/SLC-off | 14-Sep-16 | 15 (pan) |
| 80  | Landsat-8/OLI          | 15-Sep-16 | 15 (pan) |
| 81  | Landsat-8/OLI          | 22-Sep-16 | 15 (pan) |
| 82  | Landsat-7 ETM+/SLC-off | 23-Sep-16 | 15 (pan) |
| 83  | Landsat-8/OLI          | 24-Sep-16 | 15 (pan) |
| 84  | Landsat-8/OLI          | 14-Jun-17 | 15 (pan) |
| 85  | Landsat-8/OLI          | 30-Jun-17 | 15 (pan) |
| 86  | Landsat-8/OLI          | 1-Jul-17  | 15 (pan) |
| 87  | Landsat-8/OLI          | 7-Jul-17  | 15 (pan) |
| 88  | Landsat-8/OLI          | 9-Jul-17  | 15 (pan) |
| 89  | Landsat-8/OLI          | 16-Jul-17 | 15 (pan) |
| 90  | Landsat-8/OLI          | 25-Jul-17 | 15 (pan) |
| 91  | Landsat-8/OLI          | 1-Aug-17  | 15 (pan) |
| 92  | Landsat-8/OLI          | 8-Aug-17  | 15 (pan) |
| 93  | Landsat-8/OLI          | 10-Aug-17 | 15 (pan) |
| 94  | Landsat-8/OLI          | 26-Aug-17 | 15 (pan) |
| 95  | Landsat-8/OLI          | 2-Sep-17  | 15 (pan) |
| 96  | Landsat-7 ETM+/SLC-off | 17-Sep-17 | 15 (pan) |
| 97  | Landsat-8/OLI          | 11-Oct-17 | 15 (pan) |
| 98  | Landsat-8/OLI          | 25-Jun-18 | 15 (pan) |
| 99  | Landsat-8/OLI          | 10-Jul-18 | 15 (pan) |
| 100 | Landsat-8/OLI          | 19-Jul-18 | 15 (pan) |

---

| <b>Purpose of use</b>             | <b>ID</b> | <b>Satellite</b> | <b>Acquisition date</b> |
|-----------------------------------|-----------|------------------|-------------------------|
| short-lived glacial lake analysis | 1         | Sentinel-2       | 10-Jun-16               |
| short-lived glacial lake analysis | 2         | Sentinel-2       | 30-Jun-16               |
| short-lived glacial lake analysis | 3         | Sentinel-2       | 17-Jul-16               |
| short-lived glacial lake analysis | 4         | Sentinel-2       | 9-Aug-16                |
| short-lived glacial lake analysis | 5         | Sentinel-2       | 29-Aug-16               |
| short-lived glacial lake analysis | 6         | Sentinel-2       | 18-Sep-16               |
| short-lived glacial lake analysis | 7         | Sentinel-2       | 8-Oct-16                |
| short-lived glacial lake analysis | 8         | Sentinel-2       | 12-Jun-17               |
| short-lived glacial lake analysis | 9         | Sentinel-2       | 15-Jun-17               |
| short-lived glacial lake analysis | 10        | Sentinel-2       | 17-Jun-17               |
| short-lived glacial lake analysis | 11        | Sentinel-2       | 21-Jun-17               |
| short-lived glacial lake analysis | 12        | Sentinel-2       | 30-Jun-17               |
| short-lived glacial lake analysis | 13        | Sentinel-2       | 2-Jul-17                |
| short-lived glacial lake analysis | 14        | Sentinel-2       | 7-Jul-17                |
| short-lived glacial lake analysis | 15        | Sentinel-2       | 9-Jul-17                |
| short-lived glacial lake analysis | 16        | Sentinel-2       | 20-Jul-17               |
| short-lived glacial lake analysis | 17        | Sentinel-2       | 22-Jul-17               |
| short-lived glacial lake analysis | 18        | Sentinel-2       | 27-Jul-17               |
| short-lived glacial lake analysis | 19        | Sentinel-2       | 9-Aug-17                |
| short-lived glacial lake analysis | 20        | Sentinel-2       | 14-Aug-17               |
| short-lived glacial lake analysis | 21        | Sentinel-2       | 29-Aug-17               |
| short-lived glacial lake analysis | 22        | Sentinel-2       | 29-Aug-17               |
| short-lived glacial lake analysis | 23        | Sentinel-2       | 31-Aug-17               |
| short-lived glacial lake analysis | 24        | Sentinel-2       | 18-Sep-17               |
| short-lived glacial lake analysis | 25        | Sentinel-2       | 20-Sep-17               |
| short-lived glacial lake analysis | 26        | Sentinel-2       | 23-Sep-17               |
| short-lived glacial lake analysis | 27        | Sentinel-2       | 10-Oct-17               |
| short-lived glacial lake analysis | 28        | Sentinel-2       | 10-Jun-18               |
| short-lived glacial lake analysis | 29        | Sentinel-2       | 17-Jun-18               |
| short-lived glacial lake analysis | 30        | Sentinel-2       | 22-Jun-18               |
| short-lived glacial lake analysis | 31        | Sentinel-2       | 30-Jun-18               |
| short-lived glacial lake analysis | 32        | Sentinel-2       | 7-Jul-18                |
| short-lived glacial lake analysis | 33        | Sentinel-2       | 10-Jul-18               |
| short-lived glacial lake analysis | 34        | Sentinel-2       | 22-Jul-18               |
| short-lived glacial lake analysis | 35        | Sentinel-2       | 25-Jul-18               |
| short-lived glacial lake analysis | 36        | Sentinel-2       | 27-Jul-18               |
| short-lived glacial lake analysis | 37        | Sentinel-2       | 27-Jul-18               |

|                                   |    |            |           |
|-----------------------------------|----|------------|-----------|
| short-lived glacial lake analysis | 38 | Sentinel-2 | 30-Jul-18 |
| short-lived glacial lake analysis | 39 | Sentinel-2 | 1-Aug-18  |
| short-lived glacial lake analysis | 40 | Sentinel-2 | 4-Aug-18  |
| short-lived glacial lake analysis | 41 | Sentinel-2 | 9-Aug-18  |
| short-lived glacial lake analysis | 42 | Sentinel-2 | 11-Aug-18 |
| short-lived glacial lake analysis | 43 | Sentinel-2 | 14-Aug-18 |
| short-lived glacial lake analysis | 44 | Sentinel-2 | 16-Aug-18 |
| short-lived glacial lake analysis | 45 | Sentinel-2 | 20-Aug-18 |
| short-lived glacial lake analysis | 46 | Sentinel-2 | 29-Aug-18 |
| short-lived glacial lake analysis | 47 | Sentinel-2 | 31-Aug-18 |
| short-lived glacial lake analysis | 48 | Sentinel-2 | 3-Sep-18  |
| short-lived glacial lake analysis | 49 | Sentinel-2 | 5-Sep-18  |
| short-lived glacial lake analysis | 50 | Sentinel-2 | 8-Sep-18  |
| short-lived glacial lake analysis | 51 | Sentinel-2 | 13-Sep-18 |
| short-lived glacial lake analysis | 52 | Sentinel-2 | 30-Sep-18 |
| short-lived glacial lake analysis | 53 | Sentinel-2 | 6-Aug-19  |
| short-lived glacial lake analysis | 54 | Sentinel-2 | 11-Aug-19 |
| short-lived glacial lake analysis | 55 | Sentinel-2 | 21-Aug-19 |
| short-lived glacial lake analysis | 56 | Sentinel-2 | 26-Aug-19 |
| short-lived glacial lake analysis | 57 | Sentinel-2 | 29-Aug-19 |
| short-lived glacial lake analysis | 58 | Sentinel-2 | 31-Aug-19 |

---

### PlanetScope

---

|                                   | <b>ID</b> | <b>Satellite</b> | <b>Acquisition date</b> |
|-----------------------------------|-----------|------------------|-------------------------|
| short-lived glacial lake analysis | 1         | Planet Scope     | 28-Jul-13               |
| short-lived glacial lake analysis | 2         | Planet Scope     | 18-Aug-13               |
| short-lived glacial lake analysis | 3         | Planet Scope     | 27-Jun-14               |
| short-lived glacial lake analysis | 4         | Planet Scope     | 30-Jun-17               |
| short-lived glacial lake analysis | 5         | Planet Scope     | 15-Jul-17               |
| short-lived glacial lake analysis | 6         | Planet Scope     | 31-Jul-17               |
| short-lived glacial lake analysis | 7         | Planet Scope     | 18-Aug-17               |
| short-lived glacial lake analysis | 8         | Planet Scope     | 10-Jul-18               |
| short-lived glacial lake analysis | 9         | Planet Scope     | 27-Jul-18               |
| short-lived glacial lake analysis | 10        | Planet Scope     | 19-Aug-18               |
| short-lived glacial lake analysis | 11        | Planet Scope     | 23-Aug-18               |
| short-lived glacial lake analysis | 12        | Planet Scope     | 29-Aug-18               |
| short-lived glacial lake analysis | 13        | Planet Scope     | 30-Aug-18               |
| short-lived glacial lake analysis | 14        | Planet Scope     | 5-Jul-19                |
| short-lived glacial lake analysis | 15        | Planet Scope     | 23-Jul-19               |

|                                   |    |              |           |
|-----------------------------------|----|--------------|-----------|
| short-lived glacial lake analysis | 16 | Planet Scope | 7-Aug-19  |
| short-lived glacial lake analysis | 17 | Planet Scope | 12-Aug-19 |
| short-lived glacial lake analysis | 18 | Planet Scope | 23-Aug-19 |
| short-lived glacial lake analysis | 19 | Planet Scope | 26-Aug-19 |

short-lived glacial lake analysis

short-lived glacial lake analysis

---

**ALOS/AV**

short-lived glacial lake analysis

**ID**

**Satellite**

**Acquisition date**

short-lived glacial lake analysis

1

ALOS/AVNIR-2

2007/9/17

short-lived glacial lake analysis

---







|   |                       |
|---|-----------------------|
| 3 | Korumdu lake analysis |

---

**NIR-2**

---

| <b>Resolution (m)</b> | <b>Purpose of use</b>    |
|-----------------------|--------------------------|
| 2.5                   | Korumdu Glacier analysis |

---
